# Supplementary material for: Improving power and accuracy of genome-wide association studies via a multi-locus mixed linear model methodology
Source: Springer Nature journal article supplement (doi:10.1038/srep19444), 2016-01-20
Supplement: 41598_2016_BFsrep19444_MOESM1_ESM.pdf [file 41598_2016_BFsrep19444_MOESM1_ESM.pdf]

## Improving power and accuracy of genome-wide association studies via a multi-locus mixed linear model methodology

Shi-Bo Wang<sup>1,2</sup>, Jian-Ying Feng<sup>1</sup>, Wen-Long Ren<sup>1</sup>, Bo Huang<sup>1</sup>, Ling Zhou<sup>1</sup>, Yang-Jun Wen<sup>1</sup>,  
Jin Zhang<sup>1</sup>, Jim M. Dunwell<sup>3</sup>, Shizhong Xu<sup>4</sup> & Yuan-Ming Zhang<sup>1,2</sup>

<sup>1</sup>State Key Laboratory of Crop Genetics and Germplasm Enhancement, Nanjing Agricultural University, Nanjing 210095, China, <sup>2</sup>Statistical Genomics Lab, College of Plant Science and Technology, Huazhong Agricultural University, Wuhan 430070, China, <sup>3</sup>School of Agriculture, Policy and Development, University of Reading, Reading RG6 6AR, United Kingdom, <sup>4</sup>Department of Botany and Plant Science, University of California, Riverside 20705, USA.

**Table S1** | Comparison of powers and mean squared errors (MSE) for three GWAS methods (MRMLM, RMLM and EMMA) from the first simulation experiment where six QTNs were simulated.

| QTN | True value |               |        |                    | MRMLM     |        |        | RMLM      |        |        | EMMA      |        |        |
|-----|------------|---------------|--------|--------------------|-----------|--------|--------|-----------|--------|--------|-----------|--------|--------|
|     | Chr.       | Position (bp) | Effect | r <sup>2</sup> (%) | Power (%) | Effect | MSE    | Power (%) | Effect | MSE    | Power (%) | Effect | MSE    |
| 1   | 1          | 11298364      | 1.4762 | 10                 | 94.8      | 1.5412 | 0.0701 | 84.7      | 1.7694 | 0.1445 | 72.7      | 1.9084 | 0.2309 |
| 2   | 1          | 11655607      | 1.0438 | 5                  | 63.9      | 1.2083 | 0.0674 | 38.2      | 1.6772 | 0.4582 | 22.1      | 1.8464 | 0.6634 |
| 3   | 2          | 5066968       | 1.0438 | 5                  | 49.3      | 1.3291 | 0.1423 | 37.5      | 1.6921 | 0.4538 | 24.2      | 1.8675 | 0.7049 |
| 4   | 2          | 5134228       | 1.8080 | 15                 | 97.3      | 1.7922 | 0.0867 | 91.6      | 2.0617 | 0.1308 | 89.9      | 2.1590 | 0.1766 |
| 5   | 2          | 5464675       | 1.0438 | 5                  | 42.7      | 1.3178 | 0.1318 | 43.2      | 1.8328 | 0.6532 | 35.7      | 1.9862 | 0.9128 |
| 6   | 2          | 6137189       | 1.0438 | 5                  | 63.5      | 1.2072 | 0.0659 | 48.8      | 1.6263 | 0.3688 | 31.4      | 1.7836 | 0.5704 |

**Table S2** | Comparison of powers and mean squared errors (MSE) for three GWAS methods (MRMLM, RMLM and EMMA) from the second simulation experiment where six QTNs plus a polygene were simulated.

| QTN | True value |               |        |                    | MRMLM     |        |        | RMLM      |        |        | EMMA      |        |        |
|-----|------------|---------------|--------|--------------------|-----------|--------|--------|-----------|--------|--------|-----------|--------|--------|
|     | Chr.       | Position (bp) | Effect | r <sup>2</sup> (%) | Power (%) | Effect | MSE    | Power (%) | Effect | MSE    | Power (%) | Effect | MSE    |
| 1   | 1          | 11298364      | 1.6171 | 10                 | 95.6      | 1.5845 | 0.0692 | 85.6      | 1.8629 | 0.1143 | 71.7      | 1.9993 | 0.1852 |
| 2   | 1          | 11655607      | 1.1435 | 5                  | 65.9      | 1.2283 | 0.0484 | 43.3      | 1.7809 | 0.4344 | 22.1      | 1.9752 | 0.7121 |
| 3   | 2          | 5066968       | 1.1435 | 5                  | 39.7      | 1.3408 | 0.0973 | 22.7      | 1.7331 | 0.3695 | 8.5       | 1.9486 | 0.6665 |
| 4   | 2          | 5134228       | 1.9806 | 15                 | 98.8      | 2.0872 | 0.1177 | 99.6      | 2.3817 | 0.2435 | 98.8      | 2.4713 | 0.3111 |
| 5   | 2          | 5464675       | 1.1435 | 5                  | 29.6      | 1.3282 | 0.0924 | 26.5      | 1.9281 | 0.6405 | 16.6      | 2.1039 | 0.9415 |
| 6   | 2          | 6137189       | 1.1435 | 5                  | 76.1      | 1.3339 | 0.0861 | 57.3      | 1.7288 | 0.3743 | 37.3      | 1.8969 | 0.5915 |

**Table S3** | Comparison of powers and mean squared errors (MSE) for three GWAS methods (MRMLM, RMLM and EMMA) from the third simulation experiment where six QTNs, a polygene and three pairs of epistatic effects were simulated.

| QTN | True value |               |        |                    | MRMLM     |        |        | RMLM      |        |        | EMMA      |        |        |
|-----|------------|---------------|--------|--------------------|-----------|--------|--------|-----------|--------|--------|-----------|--------|--------|
|     | Chr.       | Position (bp) | Effect | r <sup>2</sup> (%) | Power (%) | Effect | MSE    | Power (%) | Effect | MSE    | Power (%) | Effect | MSE    |
| 1   | 1          | 11298364      | 1.7310 | 10                 | 93.4      | 1.7479 | 0.0886 | 83.5      | 1.9855 | 0.1247 | 72.9      | 2.1286 | 0.2044 |
| 2   | 1          | 11655607      | 1.2240 | 5                  | 51.3      | 1.3319 | 0.0550 | 31.4      | 1.8845 | 0.4628 | 15.4      | 2.0837 | 0.7576 |
| 3   | 2          | 5066968       | 1.2240 | 5                  | 40.9      | 1.5137 | 0.1497 | 28.8      | 1.8711 | 0.4407 | 16.0      | 2.0656 | 0.7218 |
| 4   | 2          | 5134228       | 2.1201 | 15                 | 98.3      | 2.1022 | 0.1114 | 94.6      | 2.3934 | 0.1605 | 93.8      | 2.5027 | 0.2131 |
| 5   | 2          | 5464675       | 1.2240 | 5                  | 24.6      | 1.5209 | 0.1590 | 26.7      | 2.0423 | 0.6987 | 19.7      | 2.2242 | 1.0254 |
| 6   | 2          | 6137189       | 1.2240 | 5                  | 44.9      | 1.2886 | 0.0507 | 31.9      | 1.8111 | 0.3771 | 16.7      | 2.0238 | 0.6615 |

**Table S4** | Statistical powers and mean squared errors (MSE) of the MRMLM method under three different sample sizes (99, 149 and 199).

| QTN | True value |               |        |           | 99        |        |        | 149       |        |        | 199       |        |        |
|-----|------------|---------------|--------|-----------|-----------|--------|--------|-----------|--------|--------|-----------|--------|--------|
|     | Chr.       | Position (bp) | Effect | $r^2$ (%) | Power (%) | Effect | MSE    | Power (%) | Effect | MSE    | Power (%) | Effect | MSE    |
| 1   | 1          | 11298364      | 1.4762 | 10        | 49.6      | 1.7652 | 0.2066 | 81.0      | 1.5990 | 0.0963 | 94.8      | 1.5412 | 0.0701 |
| 2   | 1          | 11655607      | 1.0438 | 5         | 33.1      | 1.5850 | 0.3874 | 47.6      | 1.3781 | 0.1752 | 63.9      | 1.2083 | 0.0674 |
| 3   | 2          | 5066968       | 1.0438 | 5         | 20.4      | 1.6996 | 0.5371 | 39.3      | 1.4720 | 0.2713 | 49.3      | 1.3291 | 0.1423 |
| 4   | 2          | 5134228       | 1.8080 | 15        | 56.2      | 2.0754 | 0.2307 | 86.5      | 1.8133 | 0.0965 | 97.3      | 1.7922 | 0.0867 |
| 5   | 2          | 5464675       | 1.0438 | 5         | 21.6      | 1.8139 | 0.7172 | 32.1      | 1.4828 | 0.2781 | 42.7      | 1.3178 | 0.1318 |
| 6   | 2          | 6137189       | 1.0438 | 5         | 26.0      | 1.5206 | 0.3011 | 47.2      | 1.3322 | 0.1372 | 63.5      | 1.2072 | 0.0659 |

**Table S5** | Powers and mean squared errors (MSE) of the MRMLM method under two different numbers of markers (10,000 and 216,130).

| QTN | True value |               |        |                    | 10,000    |        |        | 216,130   |        |        |
|-----|------------|---------------|--------|--------------------|-----------|--------|--------|-----------|--------|--------|
|     | Chr.       | Position (bp) | Effect | r <sup>2</sup> (%) | Power (%) | Effect | MSE    | Power (%) | Effect | MSE    |
| 1   | 1          | 11298364      | 1.4762 | 10                 | 94.8      | 1.5412 | 0.0701 | 92.0      | 1.3520 | 0.2941 |
| 2   | 1          | 11655607      | 1.0438 | 5                  | 63.9      | 1.2083 | 0.0674 | 48.0      | 1.1234 | 0.0927 |
| 3   | 2          | 5066968       | 1.0438 | 5                  | 49.3      | 1.3291 | 0.1423 | 39.0      | 1.2079 | 0.1216 |
| 4   | 2          | 5134228       | 1.8080 | 15                 | 97.3      | 1.7922 | 0.0867 | 92.0      | 1.4864 | 0.0862 |
| 5   | 2          | 5464675       | 1.0438 | 5                  | 42.7      | 1.3178 | 0.1318 | 59.0      | 1.1660 | 0.1019 |
| 6   | 2          | 6137189       | 1.0438 | 5                  | 63.5      | 1.2072 | 0.0659 | 42.0      | 0.9997 | 0.0510 |

**Table S6** | Detected SNPs significantly associated with the six flowering time traits in *Arabidopsis thaliana* using three methods (MRMLM, RMLM and EMMA).

| Trait | Chr | SNP (bp) | MRMLM     |        | RMLM     |        | EMMA    |        |
|-------|-----|----------|-----------|--------|----------|--------|---------|--------|
|       |     |          | LOD score | Effect | P-value  | Effect | P-value | Effect |
| LD    | 1   | 2779077  | 9.07      | -0.099 |          |        |         |        |
|       | 1   | 8128350  | 4.12      | -0.055 |          |        |         |        |
|       | 1   | 11738770 | 4.61      | 0.056  |          |        |         |        |
|       | 1   | 16590690 | 4.83      | 0.072  |          |        |         |        |
|       | 1   | 19306376 | 8.93      | -0.092 |          |        |         |        |
|       | 2   | 3908570  | 8.38      | -0.084 |          |        |         |        |
|       | 2   | 9588685  |           |        | 4.47E-10 | -0.397 | 2.78E-9 | -0.407 |
|       | 2   | 9611587  | 8.83      | -0.104 | 7.11E-7  | -0.262 |         |        |
|       | 2   | 13168846 |           |        | 1.82E-6  | -0.271 |         |        |
|       | 3   | 7548675  | 4.97      | 0.055  |          |        |         |        |
|       | 3   | 10857602 | 5.60      | 0.070  |          |        |         |        |
|       | 3   | 15980134 | 3.53      | -0.048 |          |        |         |        |
|       | 4   | 109403   | 5.37      | -0.071 |          |        |         |        |
|       | 4   | 429928   | 5.56      | -0.074 | 3.43E-7  | -0.230 |         |        |
|       | 4   | 454542   | 4.70      | -0.066 |          |        |         |        |
|       | 4   | 1260796  | 3.06      | -0.059 |          |        |         |        |

|     |   |          |       |          |         |        |
|-----|---|----------|-------|----------|---------|--------|
|     | 4 | 2579595  | 5.29  | -0.078   |         |        |
|     | 4 | 6265724  | 4.43  | -0.055   |         |        |
|     | 4 | 6904769  | 6.65  | -0.071   |         |        |
|     | 4 | 8291057  | 6.18  | -0.060   |         |        |
|     | 4 | 8949791  | 3.74  | 0.067    |         |        |
|     | 4 | 15531205 | 7.00  | 0.072    |         |        |
|     | 4 | 15645842 | 17.92 | -0.170   | 1.32E-6 | -0.283 |
|     | 4 | 17324466 | 3.99  | 0.057    |         |        |
|     | 5 | 2047037  | 9.12  | 0.118    | 1.28E-6 | 0.282  |
|     | 5 | 3188328  | 9.48  | -0.097   | 5.08E-7 | -0.248 |
|     | 5 | 12782295 | 3.19  | -0.052   |         |        |
|     | 5 | 19469740 | 6.12  | -0.080   |         |        |
|     | 5 | 21844046 | 8.82  | -0.072   |         |        |
|     | 5 | 23928370 | 9.98  | -0.096   |         |        |
|     | 5 | 25407568 | 5.20  | -0.075   | 7.83E-7 | -0.268 |
| LDV | 1 | 164375   | 6.30  | -0.04929 |         |        |
|     | 1 | 10114810 | 3.25  | 0.026    |         |        |
|     | 1 | 26552074 | 10.09 | 0.046    |         |        |
|     | 2 | 5851520  | 5.61  | 0.034    |         |        |



|    |   |          |       |        |         |        |         |        |
|----|---|----------|-------|--------|---------|--------|---------|--------|
|    | 2 | 9588685  | 10.30 | -0.049 | 1.61E-6 | -0.111 |         |        |
|    | 2 | 18446546 | 5.75  | -0.053 | 2.66E-8 | -0.152 | 5.74E-8 | -0.158 |
|    | 3 | 16092326 | 7.82  | -0.072 |         |        |         |        |
|    | 3 | 19639423 | 5.12  | 0.034  |         |        |         |        |
|    | 3 | 21717659 | 4.33  | -0.023 |         |        |         |        |
|    | 4 | 424505   | 3.78  | -0.031 |         |        |         |        |
|    | 4 | 10528698 | 5.83  | -0.038 | 1.27E-6 | -0.069 |         |        |
|    | 4 | 16040939 | 3.48  | -0.047 |         |        |         |        |
|    | 5 | 7704503  | 3.28  | -0.026 |         |        |         |        |
|    | 5 | 18599929 | 7.25  | -0.058 | 2.04E-7 | -0.083 | 2.71E-7 | -0.087 |
|    | 5 | 25290046 | 5.71  | -0.060 | 1.12E-7 | -0.108 | 2.35E-9 | -0.126 |
| SD | 1 | 7450037  | 7.59  | -0.043 |         |        |         |        |
|    | 1 | 10298977 | 5.69  | -0.061 |         |        |         |        |
|    | 1 | 19483362 | 6.01  | 0.042  |         |        |         |        |
|    | 1 | 19713470 | 6.21  | -0.049 |         |        |         |        |
|    | 1 | 23894668 | 6.51  | 0.058  |         |        |         |        |
|    | 2 | 1977590  | 5.43  | -0.055 |         |        |         |        |
|    | 2 | 2916675  | 3.83  | 0.030  |         |        |         |        |
|    | 2 | 3037271  | 3.75  | -0.032 |         |        |         |        |

|   |          |       |        |         |        |         |        |
|---|----------|-------|--------|---------|--------|---------|--------|
| 2 | 13184349 | 7.30  | -0.056 |         |        |         |        |
| 2 | 18992837 | 6.35  | -0.048 |         |        |         |        |
| 3 | 10516222 | 9.30  | 0.045  |         |        |         |        |
| 3 | 18021311 | 4.04  | 0.032  |         |        |         |        |
| 4 | 153402   | 6.47  | -0.042 | 2.46E-8 | -0.132 | 6.74E-8 | -0.136 |
| 4 | 458226   | 10.70 | -0.070 | 1.20E-6 | -0.132 |         |        |
| 4 | 5969868  | 4.90  | 0.029  |         |        |         |        |
| 4 | 6971183  | 9.59  | -0.059 |         |        |         |        |
| 4 | 14263080 | 4.72  | 0.031  |         |        |         |        |
| 4 | 15645842 | 17.70 | -0.089 | 8.60E-7 | -0.152 |         |        |
| 5 | 441370   | 3.35  | -0.036 |         |        |         |        |
| 5 | 3051259  | 6.23  | -0.037 |         |        |         |        |
| 5 | 3408398  | 4.27  | -0.035 |         |        |         |        |
| 5 | 6546055  | 4.66  | -0.068 |         |        |         |        |
| 5 | 7003093  | 8.12  | 0.053  |         |        |         |        |
| 5 | 10031343 | 4.62  | 0.040  |         |        |         |        |
| 5 | 17218821 | 3.47  | -0.029 |         |        |         |        |
| 5 | 18363740 | 6.30  | 0.035  |         |        |         |        |
| 5 | 21499321 | 7.06  | -0.042 |         |        |         |        |

|    |    |          |         |        |         |        |
|----|----|----------|---------|--------|---------|--------|
| W0 | 2  | 10254298 | 7.31    | -0.107 |         |        |
|    | 2  | 12724525 | 6.71    | 0.114  |         |        |
|    | 3  | 10850207 | 7.01    | -0.136 |         |        |
|    | 3  | 21239134 | 6.24    | -0.111 |         |        |
|    | 4  | 429928   | 3.54    | -0.081 | 1.18E-7 | -0.213 |
|    | 4  | 1420057  | 7.83    | -0.160 | 1.35E-6 | -0.234 |
|    | 4  | 2240573  | 4.25    | 0.093  |         |        |
|    | 4  | 5188778  | 3.94    | -0.083 |         |        |
|    | 4  | 8012841  | 3.21    | 0.090  |         |        |
|    | 5  | 4867634  | 6.06    | -0.119 | 4.30E-7 | -0.266 |
|    | 5  | 5759583  | 3.37    | 0.116  |         |        |
|    | 5  | 18592535 |         |        | 1.83E-6 | -0.274 |
|    | 5  | 18595015 | 11.87   | -0.145 | 1.83E-6 | -0.274 |
|    | 5  | 18598041 |         |        | 1.83E-6 | -0.274 |
|    | 5  | 20745711 | 3.29    | -0.083 |         |        |
|    | W2 | 1        | 2899659 | 8.11   | -0.081  |        |
| 1  |    | 3978063  | 13.38   | -0.155 | 2.11E-7 | -0.315 |
| 1  |    | 10534477 | 3.70    | 0.093  |         |        |
| 1  |    | 11014292 | 3.59    | -0.065 |         |        |

|   |          |       |        |         |        |         |        |
|---|----------|-------|--------|---------|--------|---------|--------|
| 1 | 14112717 | 3.42  | 0.060  |         |        |         |        |
| 2 | 5890727  | 3.68  | 0.049  |         |        |         |        |
| 2 | 9762418  | 5.20  | 0.083  |         |        |         |        |
| 2 | 13912889 | 6.98  | -0.110 | 9.18E-9 | -0.328 | 4.91E-8 | -0.338 |
| 3 | 5579959  | 13.92 | -0.185 | 1.19E-6 | -0.283 |         |        |
| 3 | 11837536 | 3.02  | 0.064  |         |        |         |        |
| 3 | 15772202 | 4.03  | 0.061  |         |        |         |        |
| 3 | 23090917 | 6.12  | -0.124 | 6.56E-7 | -0.282 |         |        |
| 4 | 454422   |       |        | 1.08E-6 | -0.199 |         |        |
| 4 | 454542   | 7.18  | -0.089 | 4.30E-7 | -0.207 |         |        |
| 4 | 15645842 | 4.17  | -0.104 |         |        |         |        |
| 5 | 6289819  | 6.39  | -0.086 |         |        |         |        |
| 5 | 6846957  | 3.36  | -0.082 |         |        |         |        |
| 5 | 12775299 | 4.33  | -0.055 |         |        |         |        |
| 5 | 16849870 | 3.05  | -0.053 |         |        |         |        |
| 5 | 17426385 | 4.28  | -0.080 |         |        |         |        |
| 5 | 18614346 | 3.38  | -0.057 |         |        |         |        |
| 5 | 22900714 | 6.74  | 0.070  |         |        |         |        |
| 5 | 25211216 | 3.26  | 0.052  |         |        |         |        |

|    |   |          |       |        |         |        |         |        |
|----|---|----------|-------|--------|---------|--------|---------|--------|
| W4 | 1 | 3978063  | 15.82 | -0.207 | 5.52E-8 | -0.341 | 1.61E-7 | -0.355 |
|    | 1 | 8341601  | 4.65  | -0.070 |         |        |         |        |
|    | 2 | 9588685  |       |        | 3.55E-9 | -0.354 | 1.97E-8 | -0.365 |
|    | 2 | 13031229 | 9.65  | -0.107 |         |        |         |        |
|    | 2 | 13853405 |       |        | 1.49E-6 | -0.276 |         |        |
|    | 2 | 14971763 |       |        | 2.46E-7 | -0.392 |         |        |
|    | 3 | 1571179  | 4.63  | 0.076  |         |        |         |        |
|    | 3 | 5579959  | 14.64 | -0.173 | 5.82E-7 | -0.294 |         |        |
|    | 3 | 10855475 | 4.27  | 0.088  | 2.64E-7 | 0.174  |         |        |
|    | 3 | 14573793 | 4.62  | 0.071  |         |        |         |        |
|    | 3 | 16896336 | 3.99  | 0.081  |         |        |         |        |
|    | 4 | 15358265 | 8.10  | -0.102 |         |        |         |        |
|    | 5 | 6546259  | 5.94  | -0.132 |         |        |         |        |
|    | 5 | 18264316 | 7.06  | -0.071 |         |        |         |        |
|    | 5 | 18607728 | 10.09 | -0.164 | 8.13E-7 | -0.263 |         |        |
|    | 5 | 19525511 | 3.08  | -0.084 |         |        |         |        |
|    | 5 | 21145900 | 6.85  | -0.092 |         |        |         |        |

---

**Table S7** | Genes in the neighborhood of SNPs detected by the three methods (MRMLM, RMLM and EMMA) along with the results provided in the Arabidopsis information resource

at <http://www.arabidopsis.org/> and in Atwell *et al.* (2010)

| Trait | Gene detected    | Chr | SNP (bp) | MRMLM |        |                    | RMLM     |        |                    | EMMA in this study |        |                    | EMMA in Atwell <i>et al.</i> (2010) |        | Arabidopsis Information Resource | Reference                     |
|-------|------------------|-----|----------|-------|--------|--------------------|----------|--------|--------------------|--------------------|--------|--------------------|-------------------------------------|--------|----------------------------------|-------------------------------|
|       |                  |     |          | LOD   | Effect | r <sup>2</sup> (%) | P-value  | Effect | r <sup>2</sup> (%) | P-value            | Effect | r <sup>2</sup> (%) | P-value                             | Effect |                                  |                               |
| LD    | <i>AT1G23000</i> | 1   | 8128350  | 4.12  | -0.055 | 0.56               |          |        |                    |                    |        |                    | 1.25E-3                             | -0.143 | √                                |                               |
|       | <i>SVP</i>       | 2   | 9588685  |       |        |                    | 4.47E-10 | -0.397 | 23.36              | 2.78E-9            | -0.407 | 24.59              | 2.78E-9                             | -0.407 | √                                | Hartmann <i>et al.</i> , 2000 |
|       | <i>AGL17</i>     | 2   | 9611587  | 8.83  | -0.104 | 1.67               | 7.11E-7  | -0.262 | 10.56              |                    |        |                    | 1.14E-6                             | -0.273 | √                                | Han <i>et al.</i> , 2008      |
|       | <i>ETC3</i>      | 4   | 454542   | 4.70  | -0.066 | 0.72               |          |        |                    |                    |        |                    | 3.17E-6                             | -0.223 |                                  | Tominaga <i>et al.</i> , 2008 |
|       | <i>GAI</i>       | 4   | 1260796  | 3.06  | -0.059 | 0.63               |          |        |                    |                    |        |                    | 2.30E-5                             | -0.210 |                                  | Reeves <i>et al.</i> , 2001   |
|       | <i>AT4G14385</i> | 4   | 8291057  | 6.18  | -0.060 | 0.66               |          |        |                    |                    |        |                    | 5.11E-3                             | -0.118 | √                                |                               |
|       | <i>FLC</i>       | 5   | 3188328  | 9.48  | -0.097 | 1.35               | 5.08E-7  | -0.248 | 8.73               | 8.82E-7            | -0.258 | 9.45               | 8.82E-7                             | -0.258 |                                  | Hepworth <i>et al.</i> , 2002 |
| LDV   | <i>CENH3</i>     | 1   | 164375   | 6.30  | -0.049 | 3.37               |          |        |                    |                    |        |                    | 4.07E-3                             | -0.052 | √                                |                               |
|       | <i>SVP</i>       | 2   | 9588685  | 10.30 | -0.049 | 2.98               | 1.61E-6  | -0.111 | 15.43              |                    |        |                    | 1.32E-6                             | -0.117 | √                                | Hartmann <i>et al.</i> , 2000 |
|       | <i>CKB4</i>      | 2   | 18446546 | 5.75  | -0.053 | 2.05               | 2.66E-8  | -0.152 | 16.80              | 5.74E-8            | -0.158 | 18.15              | 5.74E-8                             | -0.158 | √                                | Portolés & Más, 2007          |
|       | <i>DOG1</i>      | 5   | 18599929 | 7.25  | -0.058 | 4.77               | 2.04E-7  | -0.083 | 9.82               | 2.71E-7            | -0.087 | 10.87              | 2.71E-7                             | -0.087 |                                  |                               |
| SD    | <i>AT1G52930</i> | 1   | 19713470 | 6.21  | -0.049 | 1.27               |          |        |                    |                    |        |                    | 1.82E-3                             | -0.088 | √                                |                               |
|       | <i>HEN2</i>      | 2   | 2916675  | 3.83  | 0.030  | 0.53               |          |        |                    |                    |        |                    | 5.73E-6                             | 0.115  | √                                |                               |
|       | <i>EDA8</i>      | 4   | 153402   | 6.47  | -0.042 | 1.13               | 2.46E-8  | -0.132 | 11.26              | 6.74E-8            | -0.136 | 12.00              | 6.74E-8                             | -0.136 | √                                |                               |

|    |                  |   |          |       |        |      |         |        |       |         |         |        |         |                               |   |                               |
|----|------------------|---|----------|-------|--------|------|---------|--------|-------|---------|---------|--------|---------|-------------------------------|---|-------------------------------|
|    | <i>ETC3</i>      | 4 | 458226   | 10.70 | -0.070 | 2.03 | 1.20E-6 | -0.132 | 7.18  |         | 2.09E-6 | 0.115  |         | Tominaga <i>et al.</i> , 2008 |   |                               |
|    | <i>IDL3</i>      | 5 | 3051259  | 6.23  | -0.037 | 0.87 |         |        |       |         | 2.52E-4 | -0.087 | √       |                               |   |                               |
|    | <i>AT5G19430</i> | 5 | 6546055  | 4.66  | -0.068 | 1.36 |         |        |       |         | 1.75E-3 | -0.135 | √       |                               |   |                               |
| W0 | <i>AGL18</i>     | 3 | 21239134 | 6.24  | -0.111 | 3.13 |         |        |       |         | 1.67E-3 | -0.154 | √       | Gu <i>et al.</i> , 2013       |   |                               |
|    | <i>DOG1</i>      | 5 | 18592535 |       |        |      | 1.83E-6 | -0.274 | 12.72 |         | 3.93E-6 | -0.287 |         |                               |   |                               |
|    | <i>DOG1</i>      | 5 | 18595015 | 11.87 | -0.145 | 3.56 |         |        |       |         | 3.93E-6 | -0.287 |         |                               |   |                               |
| W2 | <i>ANP1</i>      | 1 | 2899659  | 8.11  | -0.081 | 1.55 |         |        |       |         | 5.29E-3 | -0.117 | √       |                               |   |                               |
|    | <i>ETC3</i>      | 4 | 454542   | 7.18  | -0.089 | 1.72 | 4.30E-7 | -0.207 | 9.21  |         | 8.07E-7 | -0.215 |         | Tominaga <i>et al.</i> , 2008 |   |                               |
|    | <i>DCL4</i>      | 5 | 6846957  | 3.36  | -0.082 | 0.99 |         |        |       |         | 5.95E-4 | -0.177 | √       |                               |   |                               |
| W4 | <i>ATPERK12</i>  | 1 | 8341601  | 4.65  | -0.070 | 1.34 |         |        |       |         | 3.04E-4 | -0.151 | √       |                               |   |                               |
|    | <i>SVP</i>       | 2 | 9588685  |       |        |      | 3.55E-9 | -0.354 | 28.25 | 1.97E-8 | -0.365  | 30.03  | 1.97E-8 | -0.365                        | √ | Hartmann <i>et al.</i> , 2000 |
|    | <i>AT2G30600</i> | 2 | 13031229 | 9.65  | -0.107 | 3.00 |         |        |       |         | 1.12E-3 | -0.163 | √       |                               |   |                               |
|    | <i>C3HC4</i>     | 5 | 6546259  | 5.94  | -0.132 | 2.75 |         |        |       |         | 2.96E-5 | -0.268 | √       |                               |   |                               |
|    | <i>AT5G45190</i> | 5 | 18264316 | 7.06  | -0.071 | 1.33 |         |        |       |         | 2.08E-4 | -0.135 | √       |                               |   |                               |
|    | <i>DOG1</i>      | 5 | 18607728 | 10.09 | -0.164 | 4.69 | 8.13E-7 | -0.263 | 12.09 |         | 1.61E-6 | -0.275 |         |                               |   |                               |

LD: days to flowering under long days; LDV: days to flowering under long days with vernalization; SD: days to flowering under short days; W0: days to flowering under long days for no vernalization; W2: days to flowering under long days for 2 weeks vernalization; W4: days to flowering under long days for 4 weeks vernalization.

## References

- 1 Han P, García-Ponce B, Fonseca-Salazar G, Alvarez-Buylla ER, Yu H. AGAMOUS-LIKE 17, a novel flowering promoter, acts in a FT-independent photoperiod pathway. *Plant J.* 55(2): 253-265 (2008)
- 2 Reeves, P., and Coupland, G. Analysis of flowering time control in Arabidopsis by comparison of double and triple mutants. *Plant Physiol* 126:1085-1091 (2001).
- 3 Portolés S, Más P. Altered oscillator function affects clock resonance and is responsible for the reduced day-length sensitivity of CKB4 overexpressing plants. *Plant J.* 51(6):966-77 (2007).
- 4 Hepworth, S., Valverde, F., Ravenscroft, D., Mouradov, A., and Coupland, G. Antagonistic regulation of flowering-time gene SOC1 by CONSTANS and FLC via separate promoter motifs. *EMBO J* 21:4327-4337 (2002).
- 5 Gu X, Wang Y, He Y. Photoperiodic regulation of flowering time through periodic histone deacetylation of the florigen gene FT. *PLoS Biol.* 11(9): e1001649 (2013).
- 6 Hartmann U, Hähmann S, Nettesheim K, Wisman E, Saedler H, Huijser P. Molecular cloning of SVP: A negative regulator of the floral transition in Arabidopsis. *Plant J* 21(4):351–360 (2000).
- 7 Tominaga R, Iwata M, Sano R, Inoue K, Okada K, et al. Arabidopsis CAPRICE-LIKE MYB 3 (CPL3) controls endoreduplication and flowering development in addition to trichome and root hair formation. *Development* 135: 1335–1345 (2008).



**Table S8** | Comparison of various critical values (0.001, 0.01 and 0.05) using the multi-locus random-SNP-effect mixed linear model method (MRMLM)

| QTL                         | True value |               |        |                    | 0.001     |        |        | 0.01      |        |        | 0.05      |        |        |
|-----------------------------|------------|---------------|--------|--------------------|-----------|--------|--------|-----------|--------|--------|-----------|--------|--------|
|                             | Chr.       | Position (bp) | Effect | r <sup>2</sup> (%) | Power (%) | Effect | MSE    | Power (%) | Effect | MSE    | Power (%) | Effect | MSE    |
| 1                           | 1          | 11298364      | 1.4762 | 10                 | 95.0      | 1.5795 | 0.1143 | 94.8      | 1.5412 | 0.0701 | 94.6      | 1.5669 | 0.1342 |
| 2                           | 1          | 11655607      | 1.0438 | 5                  | 64.1      | 1.2136 | 0.0660 | 63.9      | 1.2083 | 0.0674 | 57.2      | 1.2357 | 0.0794 |
| 3                           | 2          | 5066968       | 1.0438 | 5                  | 38.9      | 1.3222 | 0.1343 | 49.3      | 1.3291 | 0.1423 | 40.3      | 1.3274 | 0.1550 |
| 4                           | 2          | 5134228       | 1.8080 | 15                 | 97.3      | 1.7994 | 0.1856 | 97.3      | 1.7922 | 0.0867 | 95.7      | 1.8203 | 0.2092 |
| 5                           | 2          | 5464675       | 1.0438 | 5                  | 46.6      | 1.3503 | 0.1501 | 42.7      | 1.3178 | 0.1318 | 38.0      | 1.3910 | 0.1831 |
| 6                           | 2          | 6137189       | 1.0438 | 5                  | 66.4      | 1.2428 | 0.0798 | 63.5      | 1.2072 | 0.0659 | 63.4      | 1.2323 | 0.0801 |
| False positive rate (0.01%) |            |               |        |                    | 0.75      |        |        | 1.68      |        |        | 2.51      |        |        |

**Table S9** | Comparison of powers and mean squared errors (MSE) for three GWAS methods (MRMLM, RMLM and EMMA) with the simulated genotypic data derived from the minPtest R package from the five simulation experiment where six QTNs were simulated.

| QTN | True value |                |                    | MRMLM     |        |        | RMLM      |        |        | EMMA      |        |        |
|-----|------------|----------------|--------------------|-----------|--------|--------|-----------|--------|--------|-----------|--------|--------|
|     | Position   | Effect (SD)    | r <sup>2</sup> (%) | Power (%) | Effect | MSE    | Power (%) | Effect | MSE    | Power (%) | Effect | MSE    |
| 1   | 763        | 2.5642(0.0972) | 15                 | 99.0      | 2.3340 | 0.2266 | 94.5      | 2.5286 | 0.1866 | 85.0      | 2.7033 | 0.1598 |
| 2   | 1455       | 2.0850(0.0846) | 10                 | 91.5      | 2.0365 | 0.1451 | 74.5      | 2.2459 | 0.1618 | 54.5      | 2.4718 | 0.2284 |
| 3   | 4402       | 1.4858(0.0629) | 5                  | 44.0      | 1.5904 | 0.0919 | 15.5      | 1.9309 | 0.2973 | 6.5       | 2.2609 | 0.6682 |
| 4   | 5500       | 1.4753(0.0630) | 5                  | 46.5      | 1.6133 | 0.1016 | 19.0      | 1.9403 | 0.2763 | 5.5       | 2.2316 | 0.5951 |
| 5   | 7410       | 1.4733(0.0567) | 5                  | 48.0      | 1.6339 | 0.1000 | 19.5      | 1.9445 | 0.2848 | 9.0       | 2.2168 | 0.5909 |
| 6   | 8507       | 1.4778(0.0663) | 5                  | 45.5      | 1.6352 | 0.1000 | 16.0      | 1.9757 | 0.3137 | 5.5       | 2.3230 | 0.7324 |

### The fifth Monte Carlo simulation experiment

In the fifth simulation experiments, all the SNP genotypes were derived from the minPtest R package (Hieke et al. 2014). The sample size was 200 and the number of SNP markers was 10000. Six QTNs were simulated and placed on the SNP positions 763 (with the heritability of 0.15), 1455 (0.10), 4402

(0.05), 5500 (0.05), 7410 (0.05) and 8507 (0.05). The average was set at 10.0; and residual variance was set at 10.0. Although minor allele frequency was set at 0.30, three genotypes (AA, Aa and aa) were simulated so that the frequencies for three genotypes were calculated sample by sample. Thus, each QTN effect was calculated for each sample and standard deviation for true QTL effect was listed also in Table S9. The other was the same as those in the first simulation experiment.

## Reference

Hieke S, Binder H, Nieters A, Schumacher M. minPtest: a resampling based gene region-level testing procedure for genetic case-control studies. *Computational Statistics* **29**(1-2), 51–63 (2014).

**Software S1** | The program code for the multi-locus random-SNP-effect mixed linear model (MRMLM)

This file for the program code of the MRMLM includes the following files:

1) "input files":

nk-1.xls is the K matrix;

nx-1.xlsx is genotypic values of each SNP marker for all the individuals. This file is too large, we cannot upload as

\*.xls file. If the reviewers and readers need this file, please contact with corresponding author Yuan-Ming

Zhang (soy Zhang) (soy Zhang@mail.hzau.edu.cn);

yy-1.xls is the phenotypic values for all the individuals; for example,

3.734689  
3.258097  
5.298317  
4.419343  
5.298317  
3.373028  
5.298317  
5.298317  
5.298317  
5.298317  
3.579073  
3.516714  
3.811281  
3.2711  
3.314186  
5.298317  
5.298317  
3.65138  
4.527584  
3.465736  
3.355736  
3.847337  
3.569727  
3.308106  
3.289644  
3.455266  
5.298317  
4.944168  
3.718472

3.238678  
5.298317  
5.298317  
3.54578  
5.060574  
5.090764  
3.314186  
3.225522  
3.361531  
3.455266  
4.050771  
3.651198  
3.807589  
3.574607  
3.433987  
3.289644  
3.829395  
3.872069  
3.620258  
3.283416  
3.289644  
3.218876  
3.455266  
3.332205  
3.693902  
3.491656  
3.785137  
3.935902  
3.792521  
3.301992  
3.638133  
3.205454  
3.840349  
3.506767  
3.912857  
4.108275  
5.298317  
3.754068  
3.289644  
5.298317  
5.298317  
3.766033

4.267948  
3.560296  
3.387774  
5.298317  
3.433987  
3.99713  
3.344038  
3.164069  
3.149882  
4.595456  
3.142716  
3.361531  
4.090867  
3.326233  
3.60678  
4.169889  
3.807356  
3.390025  
3.385095  
4.446972  
3.501546  
3.734357  
3.924775  
5.298317  
5.298317  
5.222192  
4.623678  
3.606592  
3.593117  
4.150121  
4.156407  
3.850739  
3.449988  
3.952045  
3.218876  
3.629145  
3.516509  
5.298317  
5.298317  
4.554316  
3.726195  
3.044522

3.574411  
5.298317  
3.349904  
5.298317  
5.298317  
4.533048  
3.533687  
5.298317  
5.298317  
3.521652  
3.361531  
3.526361  
3.620258  
4.007938  
3.218876  
5.298317  
3.520461  
3.33814  
4.143796  
3.540959  
5.298317  
4.344347  
3.579073  
3.308106  
3.378962  
5.298317  
3.566946  
4.277245  
3.258097  
3.417727  
3.395625  
3.258097  
3.380995  
3.390025  
3.734524  
3.283416  
3.709295  
5.298317  
4.407228  
3.516509  
5.298317  
3.295837

3.536521  
3.961607  
3.314186  
4.554316  
3.460513  
5.298317  
3.733494  
3.569826  
3.491443  
3.506557  
3.301992  
3.788756

2) "program code":

"step-1-R" is R code for singly-locus random-SNP-effect mixed linear model method.

Note: the input dataset files must be the \*.csv format. The R codes are as follows.

```
dir<-"I:\\realdata"  
setwd(dir)  
  
rm(list=ls())  
gen<-read.csv(file="nx-1.csv",header=FALSE)  
phe<-read.csv(file="yy-1.csv",header=FALSE)  
kk<-read.csv(file="nk-1.csv",header=FALSE)  
  
mixed<-function(x,y,kk){  
  
  loglike<-function(theta){  
    lambda<-exp(theta)  
    logdt<-sum(log(lambda*delta+1))  
    h<-1/(lambda*delta+1)  
    yy<-sum(yu*h*yu)  
    yx<-matrix(0,q,1)  
    xx<-matrix(0,q,q)  
    for(i in 1:q){  
      yx[i]<-sum(yu*h*xu[,i])  
      for(j in 1:q){  
        xx[i,j]<-sum(xu[,i]*h*xu[,j])  
      }  
    }  
  }  
}
```



```

loglike<- -0.5*logdt-0.5*(n-q)*log(yy-t(yx)% **% solve(xx)% **% yx)-0.5*log(det(xx))
return(-loglike)
}

fixed<-function(lambda){
  h<-1/(lambda*delta+1)
  yy<-sum(yu*h*yu)
  yx<-matrix(0,q,1)
  xx<-matrix(0,q,q)
  for(i in 1:q){
    yx[i]<-sum(yu*h*xu[,i])
    for(j in 1:q){
      xx[i,j]<-sum(xu[,i]*h*xu[,j])
    }
  }
  beta<-solve(xx,yx)
  sigma2<-((yy-t(yx)% **% solve(xx)% **% yx)/(n-q)
  sigma2<-drop(sigma2)
  var<-diag(solve(xx)*sigma2)
  stderr<-sqrt(var)
  return(c(beta,stderr,sigma2))
}

qq<-eigen(kk)
delta<-qq[[1]]
uu<-qq[[2]]
q<-ncol(x)
n<-ncol(kk)
vp<-var(y)
yu<-t(uu)% **% y
xu<-t(uu)% **% x
theta<-0
parm<-optim(par=theta,fn=loglike,hessian = TRUE,method="L-BFGS-B",lower=-50,upper=10)
lambda<-exp(parm$par)
conv<-parm$convergence
fn1<-parm$value
fn0<-loglike(-Inf)
lrt<-2*(fn0-fn1)
hess<-parm$hessian
parmfix<-fixed(lambda)
beta<-parmfix[1:q]
stderr<-parmfix[(q+1):(2*q)]

```

```

sigma2<-parmfix[2*q+1]
lod<-lrt/4.61
p_value<-1-pchisq(lrt,1)
sigma2g<-lambda*sigma2
goodness<-(vp-sigma2)/vp
par<-data.frame(lrt,beta,stderr,sigma2,lambda,sigma2g,lod,p_value)
return(par)
}

loglike<-function(theta){
xi<-exp(theta)
tmp0<-zz*xi+1
tmp<-xi*solve(tmp0)
yHy<-yy-t(zy)%*%tmp%*%zy
yHx<-yx-zx)%*%tmp%*%zy
xHx<-xx-zx)%*%tmp%*%t(zx)
logdt2<-log(det(tmp0))
loglike<- -0.5*logdt2-0.5*(n-s)*log(yHy-t(yHx)%*%solve(xHx)%*%yHx)-0.5*log(det(xHx))
return(-loglike)
}

fixed<-function(xi){
tmp0<-zz*xi+diag(1)
tmp<-xi*solve(tmp0)
yHy<-yy-t(zy)%*%tmp%*%zy
yHx<-yx-zx)%*%tmp%*%zy
xHx<-xx-zx)%*%tmp%*%t(zx)
zHy<-zy-zz)%*%tmp%*%zy
zHx<-zx-zx)%*%tmp%*%zz
zHz<-zz-zz)%*%tmp%*%zz
beta<-solve(xHx,yHx)
tmp2<-solve(xHx)
sigma2<- (yHy-t(yHx)%*%tmp2%*%yHx)/(n-s)
gamma<-xi*zHy-xi*t(zHx)%*%tmp2%*%yHx
var<-abs((xi*diag(1)-xi*zHz*xi)*as.numeric(sigma2))
stderr<-sqrt(diag(var))
result<-list(gamma,stderr,beta,sigma2)
return(result)
}
name<-gen[,1:2]
gen<-gen[,3:(ncol(gen))]

```

```

gen<-t(gen)
n<-nrow(gen)
m<-ncol(gen)
x<-matrix(1,n,1)
ll<-numeric()
s<-ncol(x)
kk<-as.matrix(kk)
qq<-eigen(kk)
delta<-qq[[1]]
uu<-qq[[2]]
xu<-t(uu)%**x
for(ii in 1:1)
{yy<-phe[,1]
y<-as.matrix(yy)
parm<-mixed(x=x,y=y,kk=kk)
lambda<-parm$lambda[1]
h<-1/(delta*lambda+1)
yu<-t(uu)%**y
xx<-matrix(0,s,s)
for(i in 1:s){
  for(j in 1:s){
    xx[i,j]<-sum(xu[,i]*h*xu[,j])
  }
}
yy<-sum(yu*h*yu)
yx<-matrix(0,s,1)
for(i in 1:s){
  yx[i]<-sum(yu*h*xu[,i])
}

qq<-numeric()
for(k in 1:m){
  z<-as.matrix(gen[,k])
  zu<-t(uu)%**z
  zy<-as.matrix(sum(yu*h*z))
  zz<-as.matrix(sum(zu*h*z))
  zx<-matrix(0,s,1)
  for(i in 1:s){
    zx[i]<-sum(xu[,i]*h*z)
  }
  theta<-c(0)
  par<-optim(par=theta,fn=loglike,hessian = TRUE,method="L-BFGS-B",lower=-10,upper=10)
}

```

```

xi<-exp(par$par)
conv<-par$convergence
fn1<-par$value
hess<-par$hessian
parmfix<-fixed(xi)
gamma<-parmfix[[1]]
stderr<-parmfix[[2]]
beta<-parmfix[[3]]
sigma2<-parmfix[[4]]
lambda<-xi
sigma2g<-lambda*sigma2
fn0<-loglike(-Inf)
lrt<-2*(fn0-fn1)
p_lrt<-1-pchisq(lrt,1)
wald<-(gamma/stderr)^2
p_wald<-1-pchisq(wald,1)
parm0<-c(ii,name[k,1],name[k,2],beta,sigma2,sigma2g,gamma,stderr,wald,p_wald)
qq<-rbind(qq,parm0)
}
ll<-rbind(ll,qq)
}

parms<-ll
colnames(parms)<-c("trait","chr","pos","beta","sigma2","sigma2g","SNP_est","SNP_err","wald","p_wald")

write.table(x=parms,file="R1.csv",sep=" ",row.names=FALSE)

```

The result file for R codes is "R1.csv", which is the result for the single-locus random-SNP-effect mixed linear model method. This result will be used in the SAS program.

In the "R1" file, the first column "trait" is the trait code, the second column "chr" is the chromosome code for the SNP marker, the third column "pos" is the SNP position (bp) on chromosome, the 4th column "beta" is the estimate for fixed effect  $\beta$ ; the 5th column "sigma2" is the estimate for residual variance  $\sigma^2$ ; the 6th column "sigma2g" is the variance of SNP effect ( $\phi_k^2$  in the manuscript), the 7th column "SNP\_est" is the estimate for SNP effect ( $E(\gamma_k | \mathbf{y}^*)$ ); the 8th column "SNP\_err" is the posterior variance of SNP effect ( $\text{var}(\gamma_k | \mathbf{y}^*)$ ); and the 9th and 10th columns, "wald" and "p-wald", are the Wald statistic and its P-value.

"step-2-SAS" is SAS code for the second step of multi-locus random-SNP-effect mixed linear model method.

Note: the input dataset files must be the \*.csv format. The SAS codes are as follows.

```
%let dir=I:\realdata;
options ps=10200;
filename aa "&dir\nx-1.csv";
filename b1 "&dir\R1.csv";
filename cc "&dir\yy-1.csv";
filename dd "&dir\result1.csv";
data one;
    infile aa dlm=',' lrecl=1000000;
    input x1-x169;
run;
data c1;
    infile b1 dlm=',' lrecl=1000000 firstobs=2;
    input x1-x10;
run;
data three;
    infile cc dlm=',' lrecl=1000000;
    input x1-x1;
run;
proc iml symsize=90000000;

start ebayes_EM(x,z,y,b,u,v0,wang);
    n=nrow(z); k=ncol(z);
    if min(abs(eigval(x`*x)))<1e-6 then b=(x`*x+1e-8*i(ncol(x)))**(-1)*(x`*y);
    else b=(x`*x)**(-1)*(x`*y);
    v0=(y-x*b)`*(y-x*b)/n;
    u=j(k,1,0); v=j(k,1,0); s=j(k,1,0);

    do i=1 to k;
        zz=z[,i];
        s[i]=(zz`*zz)**(-1)*v0;          * The variance of QTL effect var(gamma);
        u[i]=s[i]*zz`(y-x*b)/v0;       * The expectation of QTL effect E(gamma);
        v[i]=u[i]**2+s[i];            * The prior variance of QTL effect sigma(i);
    end;

    vv=j(n,n,0);do i=1 to k;zz=z[,i];vv=vv+zz*zz`*v[i];end;vv=vv+i(n)*v0;

    iter=0; err=1000; iter_max=100; err_max=1e-8;
    lambda=1; * lambda is the lasso parameter;
```

```

tau=0;      * tau is the prior belief of the scaled inverse chi-square;
omega=0;    * omega is the scale of the inverse chi-square;

do while (iter<iter_max & err>err_max);
  iter = iter+1;
  v01=v0;v1=v;b1=b;
  if min(abs(eigval(vv)))<1e-6 then vi=(vv+1e-8*i(ncol(vv)))**2-1;
  else vi=vv**2-1;
  if min(abs(eigval(x`*vi*x)))<1e-6 then b=inv(x`*vi*x+1e-8*i(ncol(x)))*(x`*vi*y);
  else b=inv(x`*vi*x)*(x`*vi*y);
  r=y-x*b;

  ss=j(n,1,0);
  do i=1 to k;
    zz=z[,i];
    u[i]=v[i]*zz`*vi*r;
    s[i]=v[i]*(1-zz`*vi*zz*v[i]);
    *v[i]= (sqrt(1+4*lambda*(u[i]**2+s[i]))-1)/(2*lambda);      * lasso(lamda);
    v[i]=(u[i]**2+s[i]+omega)/(tau+2+1);      * scaled inverse chi-square;
    ss=ss + zz*u[i];
  end;
  v0=r`(r-ss)/n;

  vv=j(n,n,0);do i=1 to k;zz=z[,i];vv=vv+zz*zz`*v[i];end;vv=vv+i(n)*v0;

  err=( (b1-b)`*(b1-b)+(v01-v0)**2+(v1-(v))`*(v1-(v)))/(1+1+k);
  beta=b`;
  sigma2=v0;

end;

free wang;
do i=1 to k;
  stderr=sqrt(s[i]+ 1e-20);
  t=abs(u[i])/stderr;
  f=t**2;
  p=1-probchi(f,1);
  wang=wang/(i||t||p);
end;

finish ebayes_EM;

```

```

start lod0(xx,y,lod);
  n_sam=nrow(xx);
  nxb=ncol(xx);
  ww1=1:ncol(xx);
  lod=j(1,nxb,.);
  if ncol(ww1)>1.5 then do;
    ad=xx[,ww1];
    if abs(det(ad`*ad))<1e-6 then bb=inv(ad`*ad+i(ncol(ad))*0.01)*ad`*y;
    else bb=inv(ad`*ad)*ad`*y;
    vv1=(y-ad*bb)`*(y-ad*bb)/n_sam;
    ll1=sum(log(abs(pdf('normal',y,ad*bb,sqrt(vv1))))));

    sub=1:ncol(ww1);
    do ii=1 to ncol(ww1);
      ij=setdif(sub,ii);ad1=ad[,ij];
      if abs(det(ad1`*ad1))<1e-6 then bb1=inv(ad1`*ad1+i(ncol(ad1))*0.01)*ad1`*y;
      else bb1=inv(ad1`*ad1)*ad1`*y;
      vv0=(y-ad1*bb1)`*(y-ad1*bb1)/n_sam;
      ll0=sum(log(abs(pdf('normal',y,ad1*bb1,sqrt(vv0))))));
      lod[ww1[ii]]=-2.0*(ll0-ll1)/(2.0*log(10));
    end;end;
    do ii=2 to nxb; if lod[ii]=0 then do; lod[ii]=0; end;end;
  finish lod0;
use one; read all into x0;
use c1; read all into code;
use three; read all into yy;
cccc=x0[,1:2];
x0=x0[,3:ncol(x0)];

hh=ncol(loc(code[,10]<=0.01));
aa=(1:nrow(code))`||code[,10];
call sort(aa,2);
cc=aa[1:hh,];name=aa[1:hh,1];
w0=code[,6]||code[,8];
ww0=1-w0[,2]#w0[,2]/w0[,1];
k0=loc(ww0<0);
if ncol(k0)>0 then ww0[k0,1]=j(ncol(k0),1,0);
nn=sum(ww0);
pp=0.05/nn;
a0=ncol(loc(aa[,2]<=pp));
gg=name;

```

```

do ii=1 to nrow(name)-1;
do jj=ii+1 to nrow(name);
  if cccc[name[ii],1]=cccc[name[jj],1] then do;
    if abs(cccc[name[ii],2]-cccc[name[jj],2])<=20000 then gg[jj,1]=0;
  end;
end;
end;
end;
free misfit kk kk0 10;
if a0>0 then do;
  g0=gg[1:a0,1];
  kk0=a0;
  a0=loc(g0>0);
  g0=g0[a0,1];
  xxx0=(x0[g0,])`;
  call lod0(j(nrow(xxx0),1,1)||xxx0,yy,lod);
  lod=lod[2:ncol(lod)];
  kk=loc(lod>=1.5);
  kk1=loc(lod<1.5);
  if ncol(kk1)>0 then do;
    misfit=g0[kk1,1];
  end;
  if ncol(kk)>0 then do;
    g0=g0[kk,1];
    xx0=xxx0[,kk];
    lo=lod[kk,1];
  end;
  if ncol(kk)=0 then do;
    kk=0;
  end;
end;
else do;kk0=0;kk=0;end;
gg=gg[kk0+1:nrow(gg),1]//misfit;
a1=loc(gg>0);
a2=gg[a1,1];
xx=(x0[a2,])`;
if kk^=0 then xin=j(nrow(xx),1,1)||xx0;
else xin=j(nrow(xx),1,1);
call ebayes_EM(xin,xx,yy,b,u,v0,wang);
w2=loc(wang[,3]<=0.01);
free ww;
if ncol(w2)>0 then do;
  name=a2[w2,1];

```



```

x3=xin||xx[,w2];
call lod0(x3,yy,lod);
lod=lod[2:ncol(lod)];
w3=loc(lod>=3);
if kk^=0 then name=g0//name;
if ncol(w3)>0 then do;
    lo=lod[w3,1];
    ww=name[w3,];
end;
else ww=0;
end;
else do;
    yang=loc(lo>=3);
    if ncol(yang)>0 then do;ww=g0[yang,1];lo=lo[yang,1];end;
    else ww=0;
end;

if ww^=0 then do;
    ex=j(nrow(xx),1,1)|(x0[ww,])`;
    if abs(det(ex`*ex))<1e-6 then bbbb=inv(ex`*ex+i(ncol(ex))*0.01)*ex`*yy;
    else bbbb=inv(ex`*ex)*ex`*yy;
    eeff=bbbb[2:nrow(bbbb),1];
    wan=cccc[ww,]||eeff||lo;
end;

create t1 from wan; append from wan;close t1;
quit;
proc export data=t1 outfile=dd dbms=csv replace;
run;

```

In the "result1" file from SAS codes, the first column "COL1" is the chromosome code, the second column "COL2" is the position (bp) of each SNP marker on chromosome, the third column "COL3" is the effect of SNP, and the last one "COL4" is the LOD score in the likelihood ratio test for the SNP marker.

The results are as follows.

| COL1 | COL2     | COL3     | COL4     |
|------|----------|----------|----------|
| 4    | 429928   | -0.07362 | 5.556129 |
| 5    | 3188328  | -0.09746 | 9.484828 |
| 2    | 9611587  | -0.10405 | 8.828852 |
| 5    | 25407568 | -0.0746  | 5.196812 |
| 5    | 2047037  | 0.118348 | 9.115736 |

|   |          |          |          |
|---|----------|----------|----------|
| 4 | 15645842 | -0.16972 | 17.91585 |
| 4 | 454542   | -0.06601 | 4.697095 |
| 4 | 1260796  | -0.05925 | 3.06379  |
| 3 | 15980134 | -0.04793 | 3.534653 |
| 5 | 19469740 | -0.07981 | 6.115792 |
| 3 | 10857602 | 0.069876 | 5.602716 |
| 4 | 6265724  | -0.05453 | 4.425055 |
| 4 | 8949791  | 0.066513 | 3.741759 |
| 4 | 17324466 | 0.056529 | 3.993891 |
| 3 | 7548675  | 0.055235 | 4.970269 |
| 1 | 16590690 | 0.071829 | 4.826888 |
| 2 | 3908570  | -0.08401 | 8.382317 |
| 1 | 8128350  | -0.05538 | 4.120952 |
| 5 | 21844046 | -0.07226 | 8.821553 |
| 1 | 2779077  | -0.09919 | 9.073548 |
| 1 | 19306376 | -0.09155 | 8.925572 |
| 5 | 12782295 | -0.05176 | 3.191567 |
| 4 | 15531205 | 0.071562 | 7.002315 |
| 4 | 2579595  | -0.07774 | 5.286083 |
| 4 | 8291057  | -0.06023 | 6.179478 |
| 1 | 11738770 | 0.05638  | 4.605569 |
| 4 | 6904769  | -0.07102 | 6.645415 |
| 4 | 109403   | -0.07116 | 5.369578 |
| 5 | 23928370 | -0.09638 | 9.975715 |
